# Supplementary material for: Hand-Portable Miniaturized Liquid Chromatography for the Determination of Chlorogenic Acids in Dietary Supplements
Source: MDPI journal article supplement (doi:10.3390/antiox11122408), 2022-12-05
Supplement: s1 [file s1]

## **Supplementary content**

### **Portable nano-liquid chromatography for nutraceuticals**

C. Soto<sup>1</sup>, H. D. Ponce-Rodríguez<sup>1,2</sup> (ORCID:0000-0002-8949-7679), J. Verdú-Andrés<sup>1</sup> (ORCID: 0000-0002-7261-4488), R. Herráez-Hernández<sup>1\*</sup> (ORCID 0000-0002-5106-0826), P. Campíns-Falcó<sup>1\*</sup> (ORCID: 0000-0002-0980-8298)

1- MINTOTA Research Group, Departament de Química Analítica, Facultat de Química, Universitat de València, Dr. Moliner 50, 46100-Burjassot, València, Spain.

2- Departamento de Control Químico, Facultad de Química y Farmacia, Universidad Nacional Autónoma de Honduras, Ciudad Universitaria, Tegucigalpa, Honduras.

\*Corresponding author: Tel.:34-94-3544978; Fax: 34-94-3544436

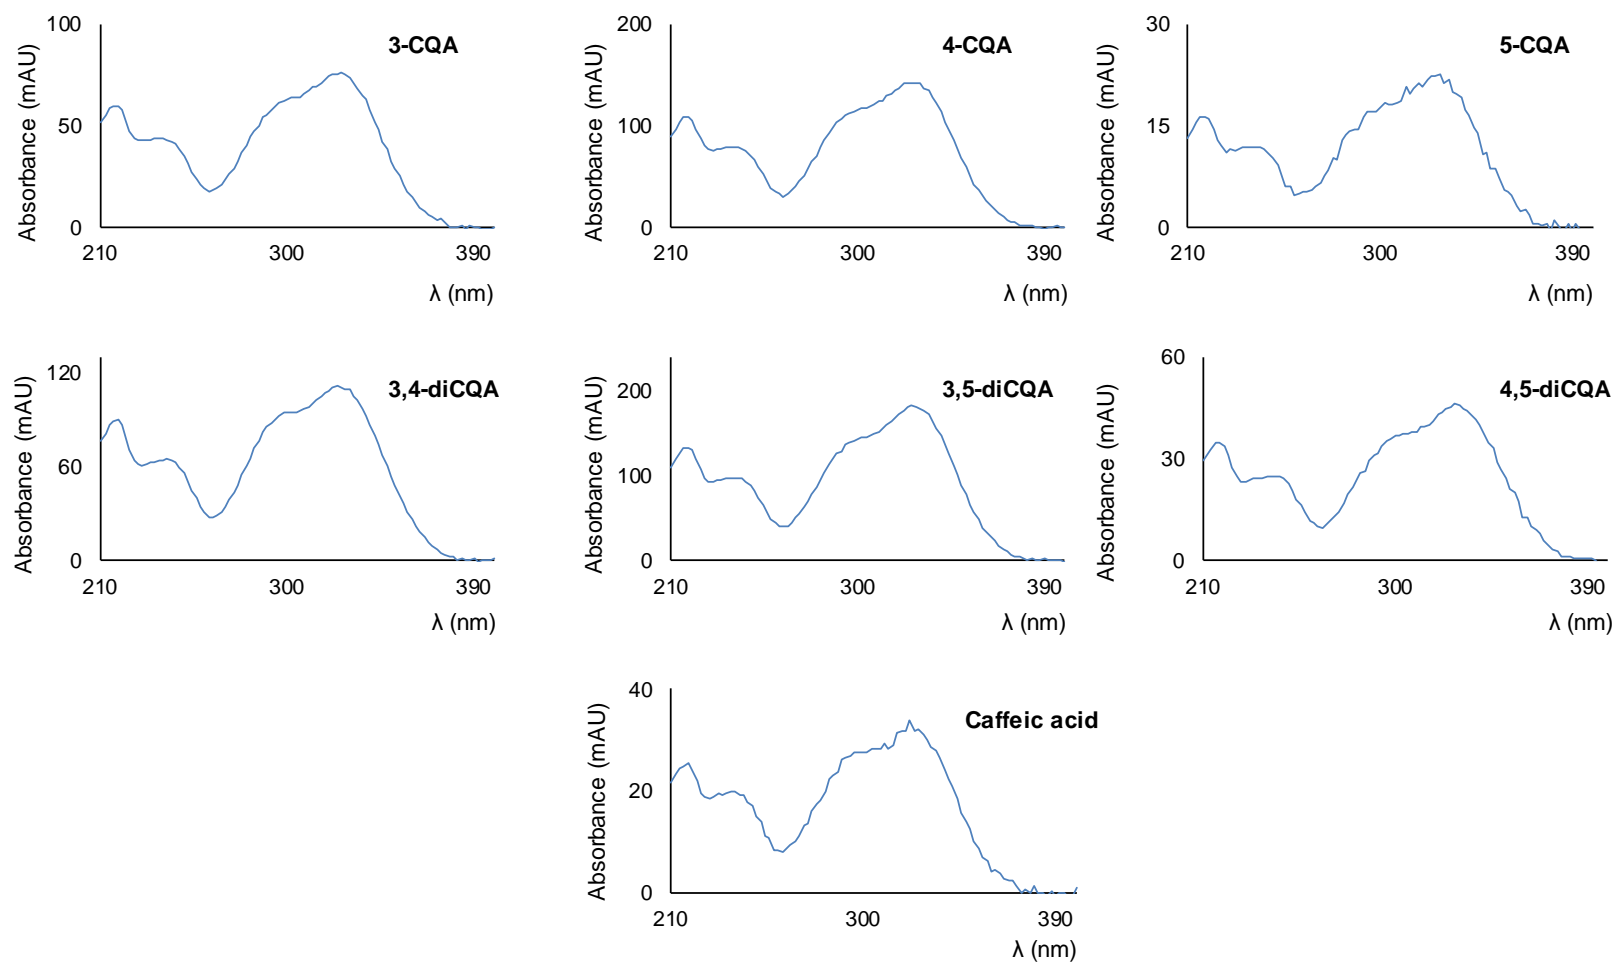

**Figure S1.** UV spectra of the tested compounds registered at the retention times of the analytes with the capLC system.

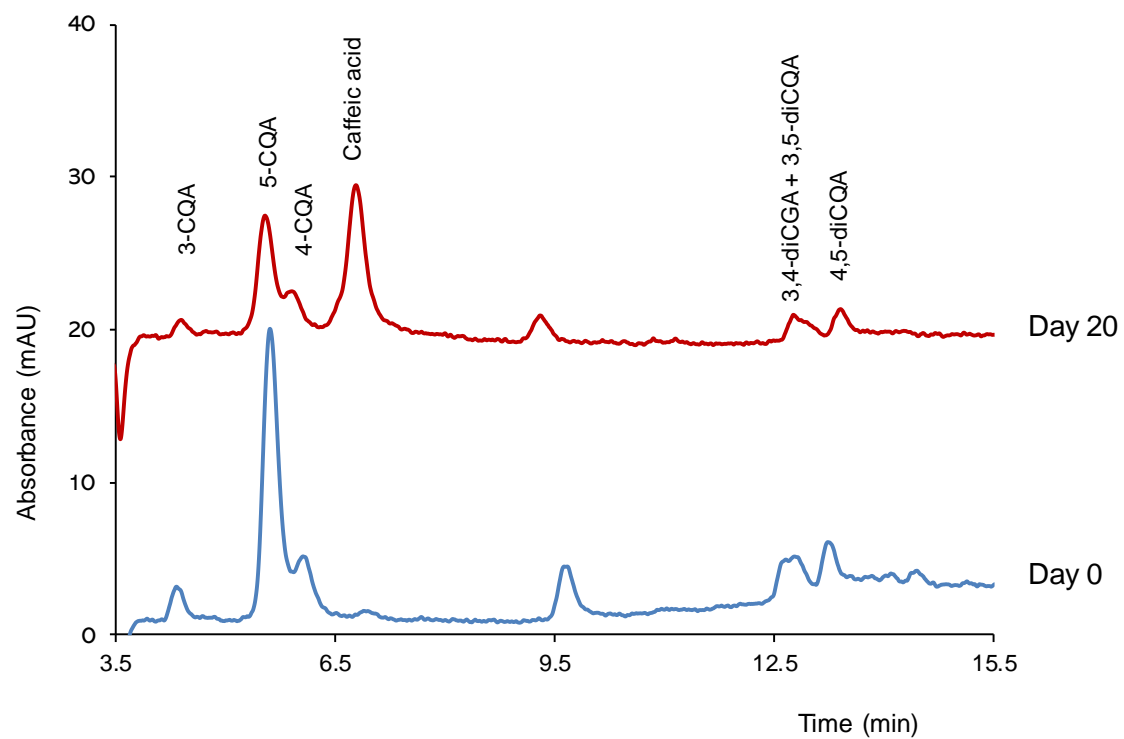

**Figure S2.** Chromatograms at 330 nm obtained with the benchtop nanoLC system for the extract of sample A, and the same extracts 20 days after being kept at 4 °C in the dark.
